# Supplementary material for: Targeting neddylation sensitizes colorectal cancer to topoisomerase I inhibitors by inactivating the DCAF13-CRL4 ubiquitin ligase complex
Source: PubMed Central journal article supplement (PMC10290057; doi:10.1038/s41467-023-39374-9), 2023-06-23
Supplement: 41467_2023_39374_MOESM2_ESM.pdf [file 41467_2023_39374_MOESM2_ESM.pdf]

**Title: Supplementary Movie 1**

**Description:** 10-sec film of TOP1 HaloTag single-molecules in U2OS treated DMSO in HCT116 cells.

**Title: Supplementary Movie 2**

**Description:** 10-sec film of TOP1 HaloTag single-molecules in U2OS after 2-h treatment of SN38 in HCT116 cells.

**Title: Supplementary Movie 3**

**Description:** 10-sec film of TOP1 HaloTag single-molecules in U2OS after 2-h treatment of SN38 + PEV in HCT116 cells.

**Title: Supplementary Movie 4**

**Description:** 10-sec film of TOP1 HaloTag single-molecules in U2OS after 2-h treatment of SN38 + TAK243 in HCT116 cells.

**Title: Supplementary Movie 5**

**Description:** 10-sec film of TOP1 HaloTag single-molecules in U2OS after 2-h treatment of SN38 + BTZ in HCT116 cells.

**Title: Supplementary Movie 6**

**Description:** 10-sec film of TOP1 HaloTag single-molecules in U2OS after 2-h treatment of SN38 + PEV + TAK243 in HCT116 cells.

**Title: Supplementary Movie 7**

**Description:** 10-sec film of TOP1 HaloTag single-molecules in U2OS after 2-h treatment of SN38 + PEV + BTZ in HCT116 cells.

**Title: Supplementary Movie 8**

**Description:** 10-sec film of TOP1 HaloTag single-molecules in U2OS after 2-h treatment of SN38 + PEV + TAK243 + BTZ in HCT116 cells

**Title: Supplementary Data 1**

**Description:** MIPE5.0 single-agent screen in HCT116 cells.

**Title: Supplementary Data 2**

**Description:** PEV Vs. all combination screen in HCT116 cells.

**Title: Supplementary Data 3**

**Description:** RNA-seq of CRC PDO #1, #2 and #3.

**Title: Supplementary Data 4**

**Description:** Toxicological studies of mice treated with irinotecan and PEV.

**Title: Supplementary Data 5**

**Description:** Proteomic analysis of His6-TOP1 interactome in HCT116 cells.
